# Supplementary material for: The 27 kDa Trypanosoma brucei Pentatricopeptide Repeat Protein is a G-tract Specific RNA Binding Protein
Source: PubMed Central journal article supplement (PMC6242908; doi:10.1038/s41598-018-34377-9), 2018-11-19
Supplement: 41598_2018_34377_MOESM1_ESM.pdf [file 41598_2018_34377_MOESM1_ESM.pdf]

SUPPLEMENTARY INFORMATION

for

**The 27 kDa *Trypanosoma brucei* Pentatricopeptide Repeat Protein is a G-tract Specific  
RNA Binding Protein**

**Pakoyo F. Kamba<sup>1,2,4</sup>, David A. Dickson<sup>1</sup>, Neil A. White<sup>1</sup>, Jennifer L. Ekstrom<sup>1</sup>, Donna J. Koslowsky<sup>2</sup>, Charles G. Hoogstraten<sup>1\*</sup>**

<sup>1</sup>Department of Biochemistry and Molecular Biology; <sup>2</sup>Graduate Program in Cell and Molecular Biology; <sup>3</sup>Department of Microbiology and Molecular Genetics, Michigan State University, East Lansing, Michigan, 48824-1319, USA; <sup>4</sup>Makerere University, Kampala, Uganda.

**Table S1.** Prediction of organellar localization of KRIPP11 by a variety of contemporary algorithms.

| Localization tool                   | Targeting prediction |
|-------------------------------------|----------------------|
| pTARGET                             | Mitochondrial        |
| TargetLoc                           | Mitochondrial        |
| DBSubLoc                            | Mitochondrial        |
| SLPFA                               | Mitochondrial        |
| Phobius                             | non-cytoplasmic      |
| ESLPred                             | Mitochondrial        |
| LOCtree                             | mitochondrial        |
| CELLO: by amino acid composition    | Mitochondrial        |
| CELLO: by N-terminal peptide        | non-mitochondrial    |
| SHERLOC: by amino acid composition  | Mitochondrial        |
| SHERLOC: by N-terminal peptide      | non-mitochondrial    |
| pLOC: by amino acid composition     | Mitochondrial        |
| MultiLoc: by amino acid composition | non-mitochondrial    |
| MultiLoc: by N-terminal peptide     | Mitochondrial        |
| TargetP 1.1                         | None                 |
| MitoProt II                         | None                 |

**Table S2.** Randomized regions of sequenced clones from *in vitro* selection experiments targeting KRIPP11. The randomized regions are flanked by 5'-AA and 3'-GA dinucleotides.

| Random region sequence <sup>a</sup> | Identified homooligomers |
|-------------------------------------|--------------------------|
| GGUAUAUAUGUUAGCUGGUC                |                          |
| UCGGGCGGCUGAGGGUUCCC                |                          |
| UCAGUACGUCUCCAUUGUUU                |                          |
| AGGUAGCGGUGGGAGCC                   |                          |
| CUCUAUGGGGCGUGUCAUUGA               | G4                       |
| AGGCGGACAACUCGUGUUUG                |                          |
| GGAUUUUCUUGGACCUCCAC                | U4                       |
| GCUCGACCAAUUUUAGUUGU                | U4                       |
| GAAAACGGGUGAGGUAAAUA                | A4                       |
| UUGUAUGGUACACCGUUGGU                |                          |
| UCGACUGAUUAAGAAGCGUU                |                          |
| CGUCGGUACUUGCGCGUGCA                |                          |
| GUGGCUCCAUACGAUUAAGG                |                          |
| GGUGCUCACGUCUCUUUG                  |                          |
| CGAGCUUGGCUUGGUCCUAC                |                          |
| CAUCU AACGACAAUCGUCUG               |                          |
| AUUUAGUGUCAACACGGUCA                |                          |
| UAGUCGUUGCUGGAGGUUUU                | U4                       |
| CAUCGUUUAAGAUCGGCUAC                |                          |
| UGUUACCUGCUGUGUCAACC                |                          |
| CGGUCGGUAGUUUAGGGAGA                |                          |
| GGUUUGAAUUAAGUUUAUC                 |                          |
| GGCCACGCACUGAGACUCGGU               |                          |
| GUUGUCGUGGUUCCGUACGG                |                          |
| AUCGGGGCCAGGGUUGGUUG                | G4                       |
| UUCUCGUGUCUCCGGGUGGU                |                          |
| CGGGGUGGCAUUCGGGGGGG                | G4; G8 <sup>b</sup>      |
| AAGUGGUAGGUAGUCUGGAC                |                          |
| AAGUGGUAGGUAGUCUGGAC                |                          |

|                       |                     |
|-----------------------|---------------------|
| UGGGUGCUGUUGGCCCGUCU  |                     |
| GUGGCCUAGCACCCGCGGGU  |                     |
| UCACUCUGAUCGAAUUCGCU  |                     |
| UGUAUCCCGAAAAGAAUUAU  | A4                  |
| AAUGGAUGUUUUUGCAUAAU  | U5                  |
| CGGUGCUUCUGUCGAGCCUUU |                     |
| GUCAAGAGACGUGUUAUUGA  |                     |
| CACUAUGUCCAGCACUGUUAU |                     |
| CUUUGACUUCAGCCUCACUU  |                     |
| CGGUUGUGCGUUAUUGGUCC  |                     |
| GAUCUGAUUGCGUGCGUGCU  |                     |
| GGAGUGCUAGUUUCCCCUCG  | C4                  |
| UUGGAAUAUAUUCCUCCAGC  |                     |
| GUCCGUCCUUCGUCUGGUGU  |                     |
| UGUUAGCUUGUUUAUCCCUC  |                     |
| GACUGCCGUUAAAGGAUGGU  |                     |
| GGCCUGUACUCCUCUUUUGA  | U4                  |
| CUAACGAUUUUCUACAUGGG  | U4; G4 <sup>b</sup> |
| ACUCUAGUGGAAUUCGUAUG  |                     |
| CGUCUUUGCGAGCAGCCACG  |                     |
| UAAACCCUGGCUGGUUGCGU  |                     |
| UCGUGGGGGAAGACUUGAAU  | G5                  |
| GACUGCCGUUAAAGGAUGGU  |                     |
| GGCCUGUACUCCUCUUUUGA  | U4                  |
| CUAACGAUUUUCUACAUGGG  | U4; G4 <sup>b</sup> |
| CAUCUUAGAGCCGGUGUCC   |                     |
| CGAUGGCCGUACGAUAGACG  |                     |
| CGAUGGCCGUACGAUAGACG  |                     |
| CAAGAGGUGUCGGGGUAAAG  | G4                  |
| UGUCUUAUUGUAUUUACAUG  |                     |
| UAGCUCAUGCCUGGUUAUUU  |                     |
| GUUCUUCGAAUGGGGCUAGA  | G4                  |

GAACGAGUCCCACUCGGCCG  
CUACGUUUUCAUACUCUCGG U4  
CUGC GGGUUGAAUGCAUUAU  
UUAUGCCCUUGCGAUCGCUC  
GAUGCCCCCUGUCGGAUGUU C5  
UUCAAUUGUUUGUGGAGACA  
CUAAGAACUGGAUUUGAUAG  
ACUGGAUGCUUUUCGGCUAG U4  
CUAAGAACUGGAUUUGAUAG  
GGUUUUGGGUUGUUCGUAU U4  
UUGUAAUGCCUAGGGAUG  
GGCUUCUUGAACGCAAUACU  
ACUGUAAUCGUAGGUGACUG  
UUACUGCUUCGAAAUGAGAC  
GGCAUGUAGUUGAAACUGAG  
CUGGUGAAAGGAGGGGUGAU G4  
CUGAGAUAAAGCUAGAUCAC  
CUUCUAACAGUGGGUUGGUC  
CAAAGUGGCGUUAGUAAGGG  
UUUCACAUAAGUCCUGCUG  
UGGGUCAUCUAACUGGCUAG  
GCUGUACAGUAUACUAGAUU  
AUGCUUAUGUAGAUCUACUU  
CAUAGAGUACUAGUAAUUGA  
GCUGCUGAGAAUCUGCUCUC  
GACGAGACCGGCUCGUCUGG  
AGGGCCCGUAUCUUGUAAA  
AUAAGACGGCUGUGUGAAUG  
CUAUUGCAGGGUGUUGAGA  
UCUGAU AUGUCUCUGUGUUA  
GAAGGCGUAGCCUAAUCCUG  
GGAUGGUAUUGAGUCAUCAU

UAAGAUAAACGCAUGAUUGC  
CGUUGUAAGGGGUCAAUGU  
CGUUGUAAGGGGUCAAUGU  
CGGCGCUGAUCGUAUGAGAG  
UUGAGGGAGCGGAUUAAGGU  
CGUUGUAAGGGGUCAAUGU  
AUCCCCUUGUAUUGGCCCGU

C4

<sup>a</sup> Random regions of 19 and 21 nucleotides represent single-base deletions and insertions during the selection process, respectively.

<sup>b</sup>Includes 3'-G from the constant region.

**Table S3.** Non-overlapping 12-mer guanosine RNA tracts (G-tracts) with at least four consecutive guanosines in *T. brucei* pre-edited transcripts of pan-edited mRNA genes.

| Gene         | G-tract      | Number of Gs within tract | Longest poly(G) |
|--------------|--------------|---------------------------|-----------------|
| 1) ND7       | GGAGGAGAGGGG | 9                         | 4               |
|              | GAGGGGAAGAGC | 7                         | 4               |
|              | CCGAGAAGGGGG | 7                         | 5               |
|              | GAGGGGAAGGGG | 9                         | 4               |
|              | GGGGCGAGCAGG | 8                         | 4               |
|              | GAGGGGGAGGGG | 10                        | 5               |
|              | GAGAGAGAGGGG | 8                         | 4               |
|              | GCGGCGGGGCAG | 8                         | 4               |
|              | GGGGGCCGCGAG | 8                         | 5               |
|              | GAGGGGAGAGUC | 7                         | 4               |
|              | GGGGGGGGGGGA | 11                        | 11              |
|              | GGGGGGGGCCGG | 10                        | 8               |
|              | GAGGAAUGGGGG | 8                         | 5               |
|              | GAGGGGACCGUA | 6                         | 4               |
|              | 2) ND8       | GGAAGGUGGGGA              | 8               |
| GGGGGAGAGCGG |              | 9                         | 5               |
| GGGGGGGAGGGG |              | 11                        | 7               |
| GGAAGGGGAGCA |              | 7                         | 4               |
| GGAGGGGAGCCA |              | 7                         | 4               |
| GAGGGGGAGAGA |              | 8                         | 5               |

|              |              |    |   |
|--------------|--------------|----|---|
|              | GGGGAGAAGGGG | 9  | 4 |
| 3) ND9       | GGGGAGAGGGUU | 8  | 4 |
|              | GGGGAGAGGAGG | 9  | 4 |
|              | AGGGGGCGAGGG | 9  | 5 |
|              | GGGGCGGGGGGG | 11 | 7 |
|              | GCGGGGGAACGC | 7  | 5 |
|              | GAGGAGGGGGGG | 10 | 7 |
|              | GGAUCCAAGGGG | 6  | 4 |
|              | GGGGGGGAGGAG | 10 | 7 |
| 4) COIII     | AAGGGGAGGGGG | 9  | 5 |
|              | GGAGGAGGGGGA | 9  | 5 |
|              | AGGGGAGGGGAG | 9  | 4 |
|              | GGAGAGGGGAGG | 9  | 4 |
|              | GGAGGGGUUGGG | 9  | 4 |
|              | GAGAGGGGGGGG | 10 | 8 |
|              | GGGGUGGGCAA  | 7  | 4 |
|              | GAGGGGGGAGAG | 9  | 6 |
|              | CGGGGGAAAGGG | 8  | 5 |
| 5) ATPase A6 | GGGGGGGAGGGG | 11 | 7 |
|              | GGGGAAGAGGAG | 8  | 4 |
|              | GGGGAGAGGCGG | 9  | 4 |
|              | GGAUAAGAGGGG | 7  | 4 |
|              | AAGGGGAAAUGG | 6  | 4 |



|          |              |    |   |
|----------|--------------|----|---|
|          | GGGGGAGGAGAG | 9  | 5 |
| 6) CR3   | AAGGAUUGGGGG | 7  | 5 |
| 7) CR4   | GGGGCAAGGGUG | 8  | 4 |
|          | AGGGGGGUUUGU | 7  | 6 |
|          | GGGGGAGAGGAA | 8  | 5 |
|          | GGGGGUUUGGGG | 9  | 5 |
|          | GAAGGGGAGAAG | 7  | 4 |
|          | AAAUUGAAGGGG | 5  | 4 |
|          | UUGAUUGGGGGG | 7  | 6 |
|          | GGGGAGAAAGUG | 7  | 4 |
|          | GGGGUGGGGGAG | 10 | 5 |
|          | GGGGAGAGGGGG | 10 | 5 |
| 8) ND3   | GGGGGGCGGGGU | 10 | 6 |
|          | GGGGUGAAGGGA | 8  | 4 |
|          | GGGGGGAGAAGG | 9  | 6 |
|          | GGGGAGGGAUCA | 7  | 4 |
| 9) RPS12 | GGGGACGGAGAG | 8  | 4 |
|          | GGGAGGCGGGGA | 9  | 4 |
|          | GAGGGUGGGGGG | 10 | 6 |

**Table S4.** Non-overlapping 12-mer guanosine RNA tracts (G-tracts) with at least four consecutive guanosines in *T. brucei* pre-edited transcripts of limited-editing mRNA genes.

| Gene     | G-tract      | Number of Gs within tract | Longest poly(G) |
|----------|--------------|---------------------------|-----------------|
| 1) Cyb   | AUAUGGGGUAGG | 6                         | 4               |
|          | GGGGAAGUGAAU | 6                         | 4               |
| 2) COII  | NONE         |                           |                 |
| 3) MURF2 | NONE         |                           |                 |

**Table S5.** Non-overlapping 12-mer guanosine RNA tracts (G-tracts) with at least four consecutive guanosines in *T. brucei* edited transcripts of both pan-edited and limited-editing mRNA genes.

| Gene         | G-tract      | Number of Gs in tract | Longest poly(G) |
|--------------|--------------|-----------------------|-----------------|
| 1) ND3       | NONE         |                       |                 |
| 2) ND7       | NONE         |                       |                 |
| 3) ND8       | NONE         |                       |                 |
| 4) ND9       | NONE         |                       |                 |
| 5) ATPase A6 | NONE         |                       |                 |
| 6) COIII     | NONE         |                       |                 |
| 7) CR3       | NONE         |                       |                 |
| 8) CR4       | NONE         |                       |                 |
| 9) RPS12     | NONE         |                       |                 |
| 10) Cyb      | UAUGGGGUAGGU | 6                     | 4               |
|              | UUUGGGGAAGUG | 6                     | 4               |
| 11) COII     | NONE         |                       |                 |
| 12) MURF2    | NONE         |                       |                 |

**Table S6.** Non-overlapping 12-mer guanosine RNA tracts (G-tracts) with at least four consecutive guanosines in transcripts of *T. brucei* never-edited mitochondrial mRNA genes.

| Gene     | G-tract      | Number of Gs in tract | Longest poly(G) |
|----------|--------------|-----------------------|-----------------|
| 1) MURF5 | NONE         |                       |                 |
| 2) MURF1 | NONE         |                       |                 |
| 3) ND1   | NONE         |                       |                 |
| 4) COI   | UGGUUUUUGGGG | 6                     | 4               |
|          | GUUGGUUGGGGG | 8                     | 5               |
| 5) ND4   | NONE         |                       |                 |
| 6) ND5   | NONE         |                       |                 |

**Table S7.** Non-overlapping 12-mer guanosine RNA tracts (G-tracts) with at least four consecutive guanosines in transcripts of *T. brucei* mitochondrial rRNA genes.

| Gene        | G-tract      | Number of Gs in tract | Longest poly(G) |
|-------------|--------------|-----------------------|-----------------|
| 1) 12S rRNA | GUUUGAUUGGGG | 6                     | 4               |
| 2) 9S rRNA  | NONE         |                       |                 |

**Table S8.** Primers used in cloning and site-directed mutagenesis.

| Activity                                                                                 | Primer code | Primer sequence (5' to 3')                                       |
|------------------------------------------------------------------------------------------|-------------|------------------------------------------------------------------|
| Add BamH1 restriction site on to 5' end of KRIPP11                                       | CGH30       | ACTTCCAGGGATCCGGTCACGTGTACGCCCTTC                                |
| Add Sall restriction site on to 3' end of KRIPP11                                        | CGH34       | GCCTGCAGGTCGACTCAACCACGAGGTAAAGT                                 |
| Insert His <sub>6</sub> tag at C-terminus of KRIPP11                                     | CGH69_F     | CCACTTTACCTCGTGGTCACCACCACCACCACCA-<br>CTGAGTCGACCTGCAG          |
|                                                                                          | CGH70_R     | CTGCAGGTCGACTCAGTGGTGGTGGTGGTGGTGA-<br>CCACGAGGTAAAGTGG          |
| Insert His <sub>6</sub> tag between MBP and KRIPP11 $\Delta$ NR2 <sup>a</sup>            | CGH67_F     | GGATTTCAGAATTCGGATCTCACCACCACCA-<br>CCACCACGAAAACCTGTACTTCCAGGG  |
|                                                                                          | CGH68_R     | CCCTGGAAGTACAGGTTTTTCGTGGTGGTGGT-<br>GGTGGTGAGATCCGAATTCTGAAATCC |
| Convert MBP-His <sub>6</sub> -KRIPP11- $\Delta$ NR2 <sup>a</sup> to MBP-His <sub>6</sub> | CGH77_F     | TACTTCCAGGGATCCTGATGCGCTCTTGCAGCC                                |
|                                                                                          | CGH78_R     | GGCTGCAAGAGCGCATCAGGATCCCTGGAAGTA                                |

<sup>a</sup>A plasmid containing a truncated form of KRIPP11 lacking the first two N-terminal PPR motifs (hence  $\Delta$ NR2) was used as template for creation of MBPHis<sub>6</sub>.

**Table S9.** Stringency conditions for successive rounds of *in vitro* selection.

| Round | [RNA] ( $\mu\text{M}$ ) | [MBP] ( $\mu\text{M}$ )<br>Counterselection | [PPR] ( $\mu\text{M}$ )<br>Selection |
|-------|-------------------------|---------------------------------------------|--------------------------------------|
| 1     | 18                      | -                                           | 8.02                                 |
| 2     | 30                      | 3.00                                        | 2.05                                 |
| 3     | 15                      | -                                           | 3.14                                 |
| 4     | 30                      | 3.04                                        | 2.19                                 |
| 5     | 30                      | -                                           | 3.21                                 |
| 6     | 30                      | 3.10                                        | 0.64                                 |
| 7     | 30                      | -                                           | 2.18                                 |
| 8     | 30                      | 2.11                                        | 2.09                                 |
| 9     | 30                      | -                                           | 1.11                                 |
| 10    | 5                       | 0.50                                        | 0.83                                 |

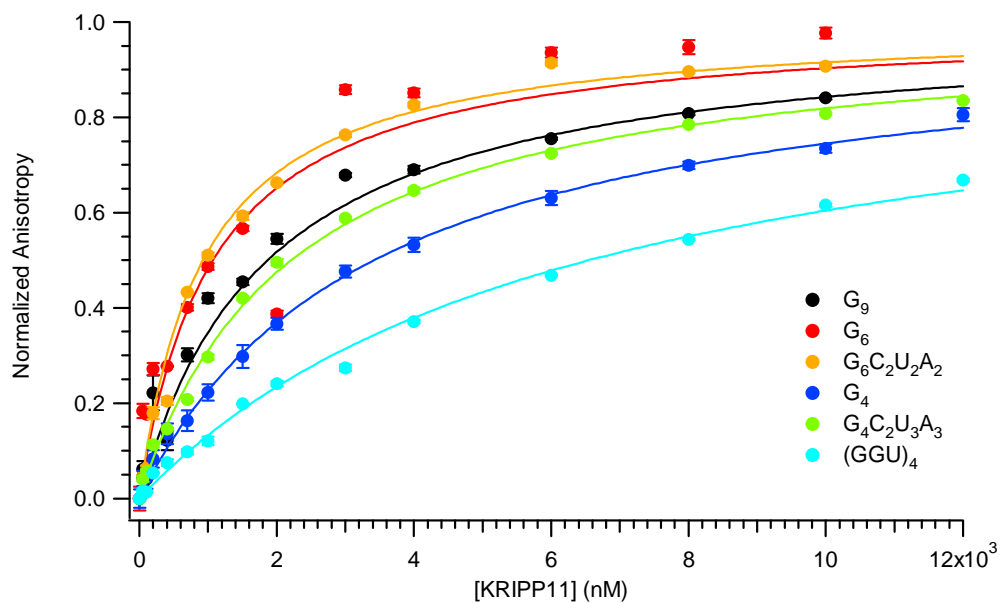

**Figure S1.** Anisotropy of interaction of KRIPP11 with RNA G-tracts having fewer than 12 guanosines. Each reaction contained 20 nM 5'-FLUO labeled ssRNA, RNA binding buffer (20 mM Tris-HCl, pH 7.5, 150 mM KCl, 5.0 mM MgCl<sub>2</sub>, 1.0 mM DTT), and MBP-KRIPP11.

**Figure S2. Original images for all gels.** In the pages that follow, labels refer to the Figure and panel in the main text.



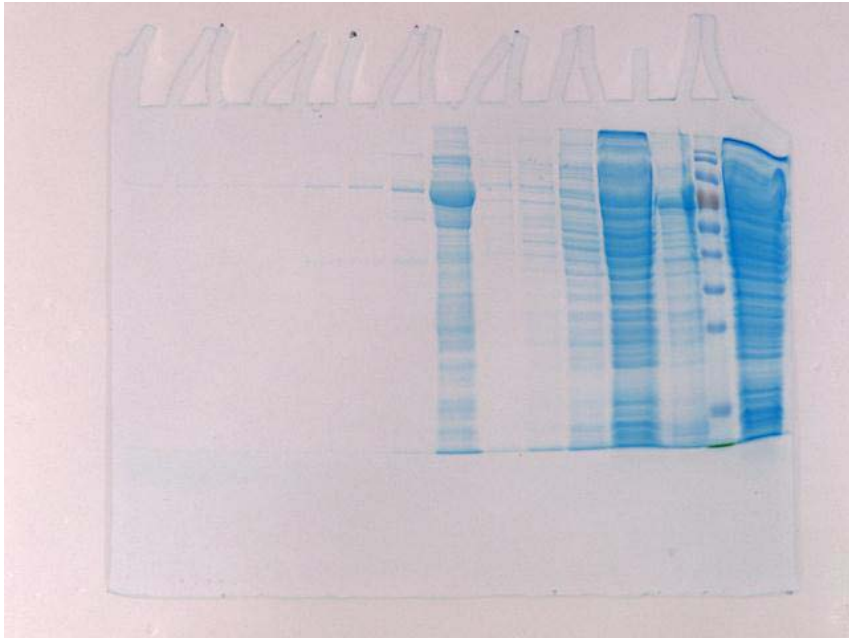

Figure 1D

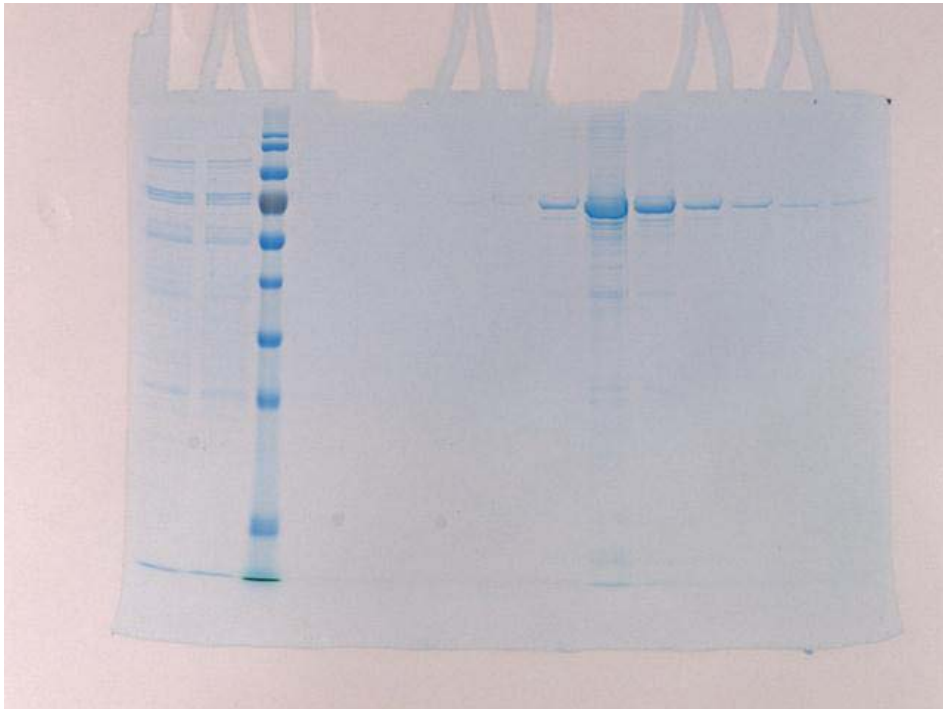

Figure 1E

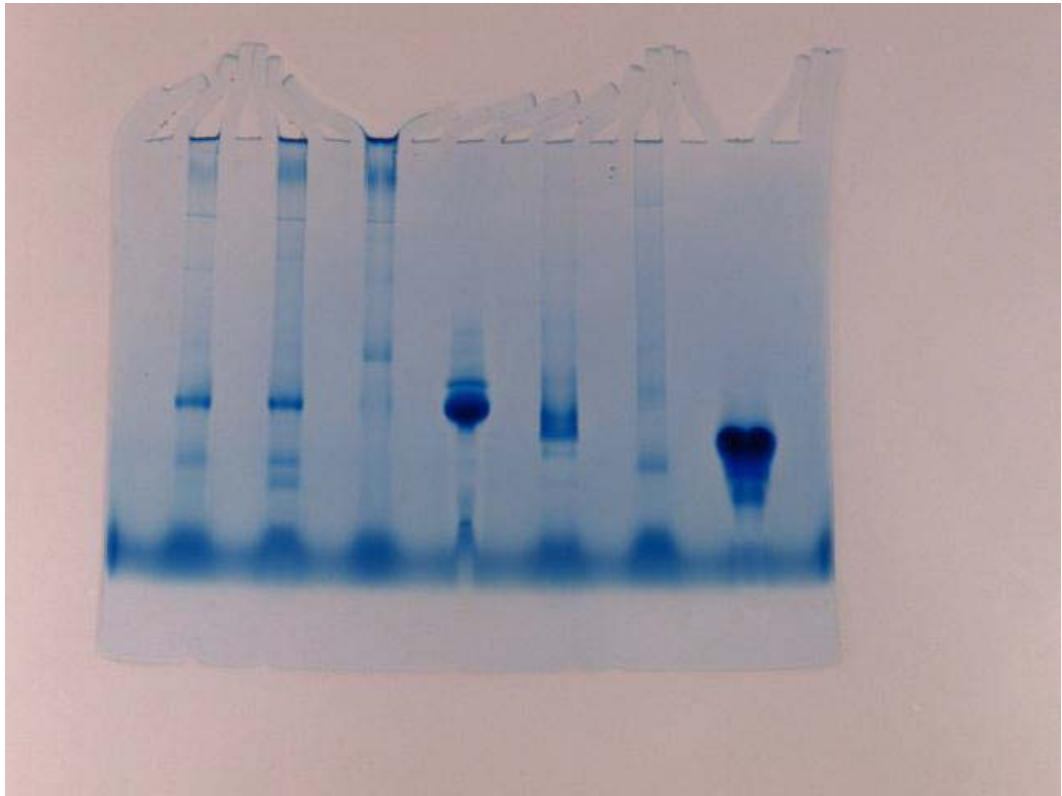

Figure 1F

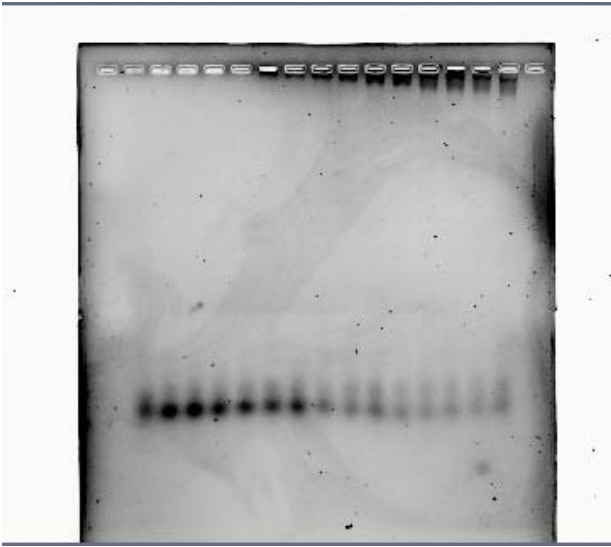

Figure 2A

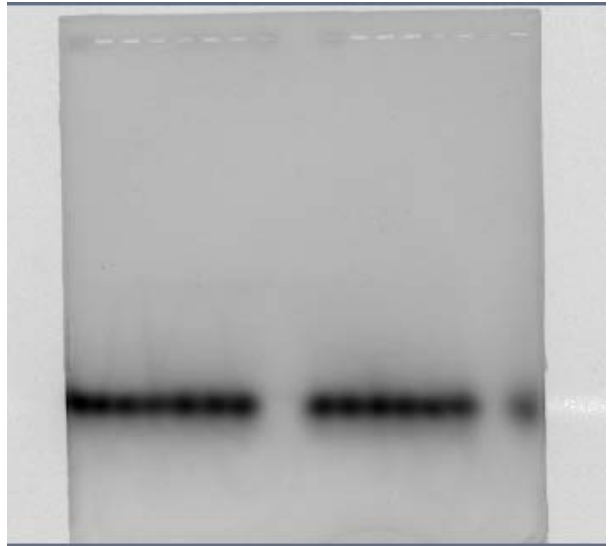

Figure 2B

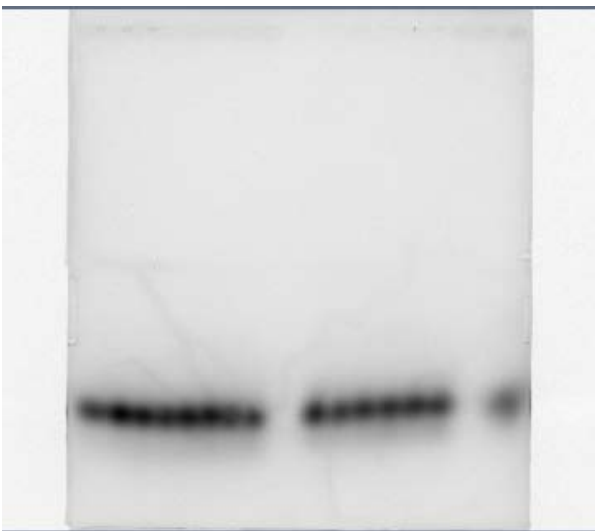

Figure 2C

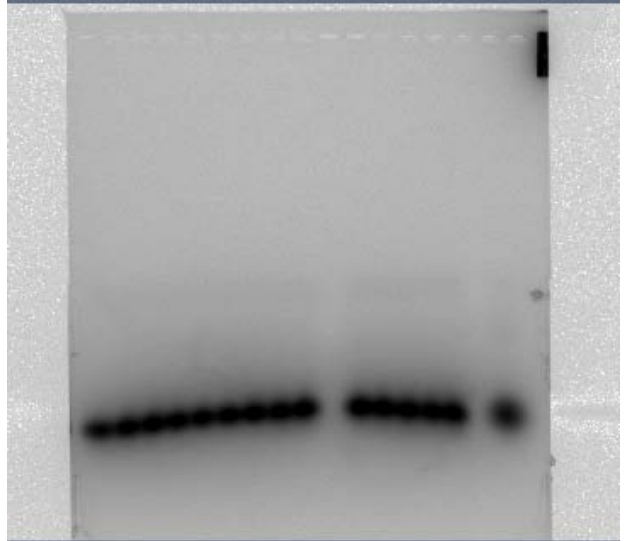

Figure 2D

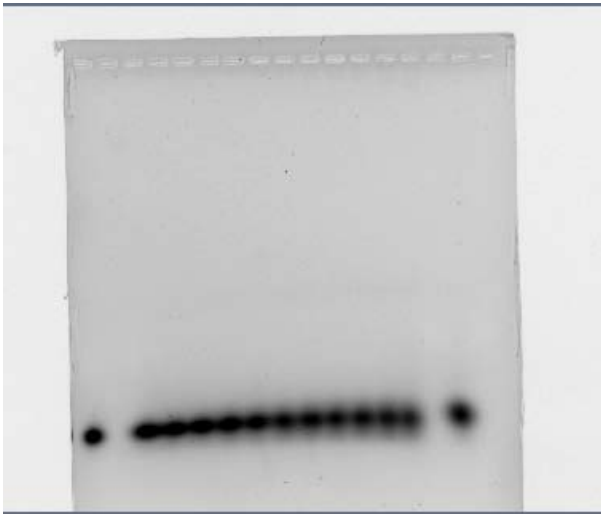

Figure 2E

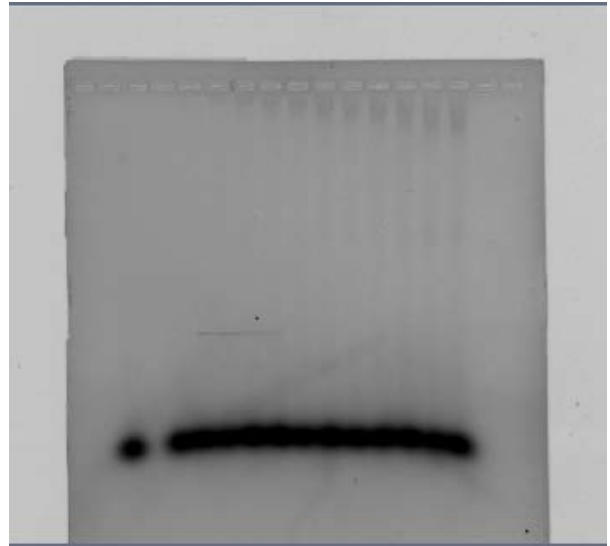

Figure 2F

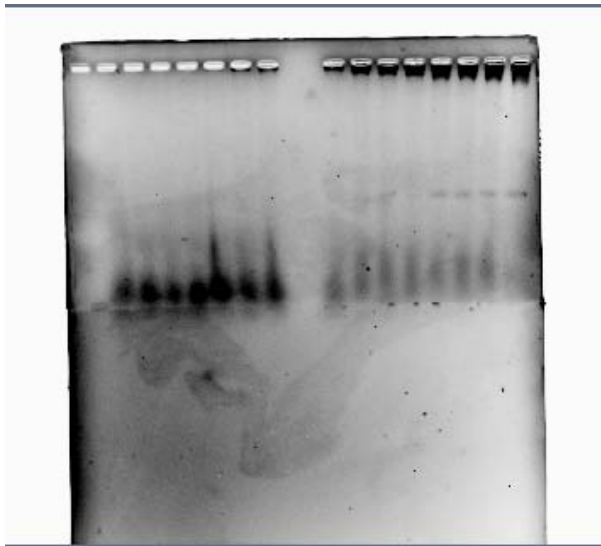

Figure 3 G<sub>9</sub>

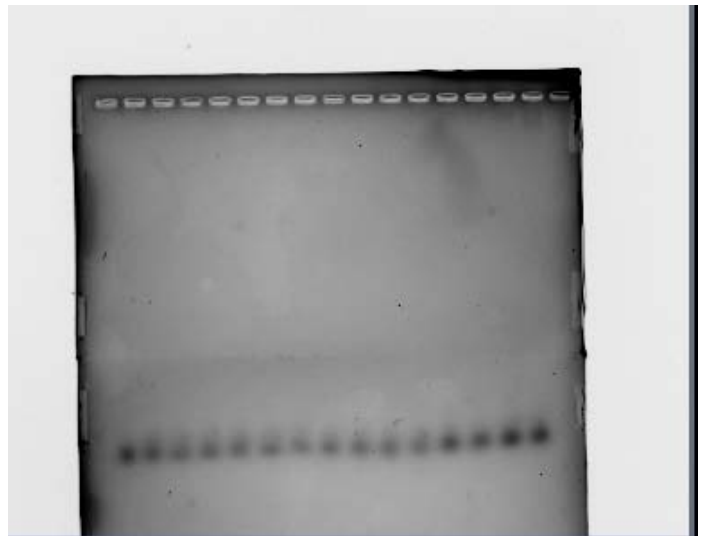

Figure 3 G<sub>6</sub>

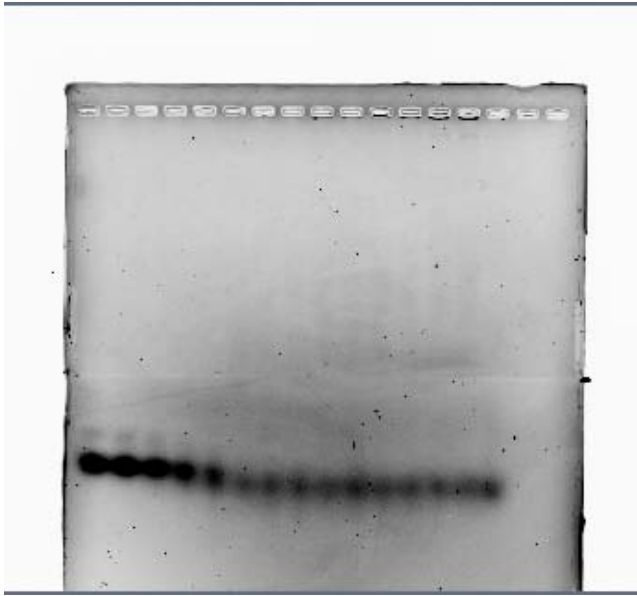

Figure 3  $G_6C_2U_2A_2$

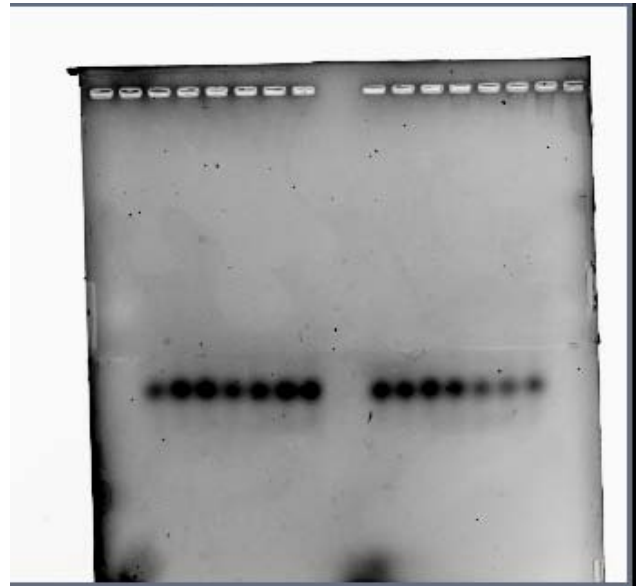

Figure 3  $G_4$

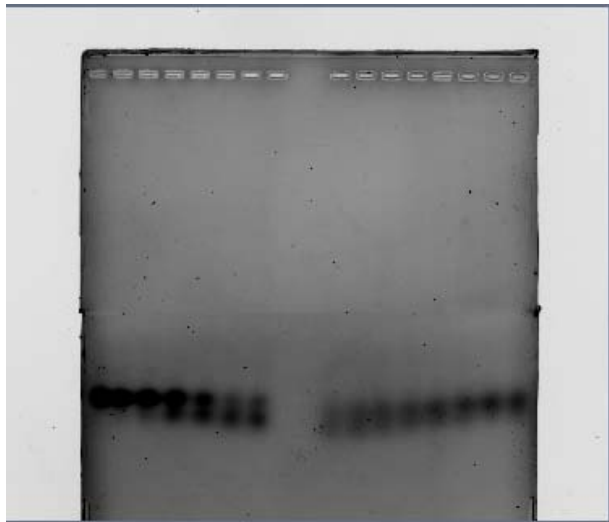

Figure 3  $G_4C_2U_3A_3$

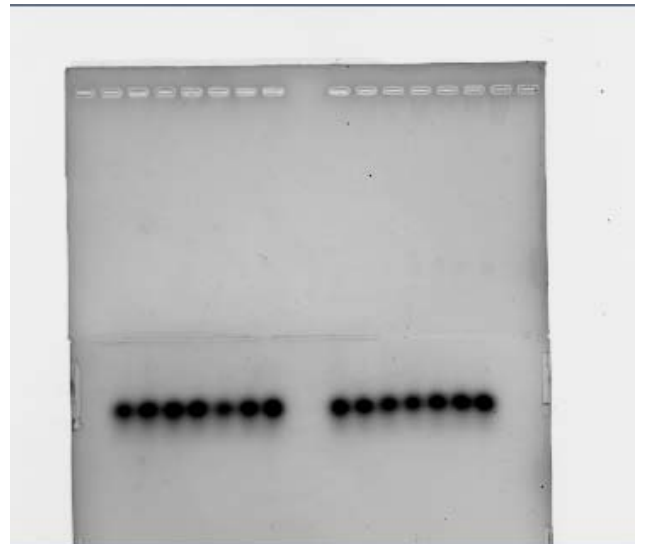

Figure 3  $(GGU)_4$

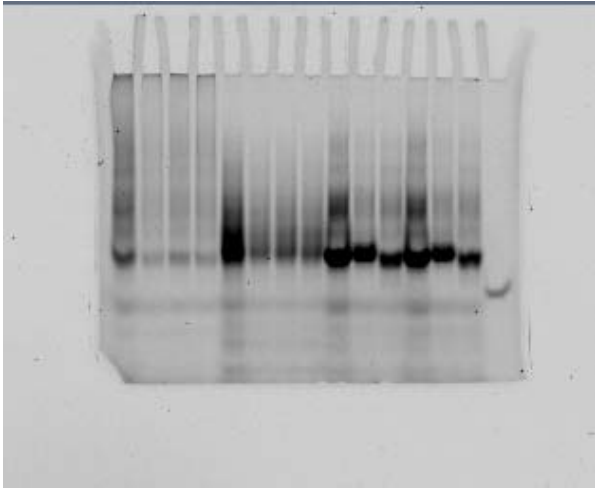

Figure 7B

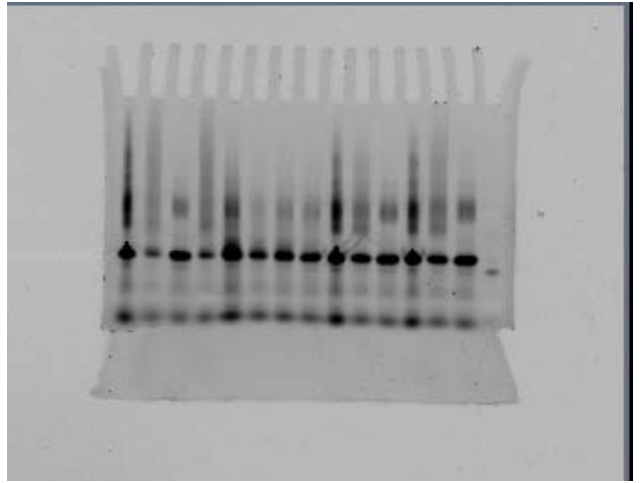

Figure 7C
